# Supplementary material for: CDK4/6 inhibition promotes immune infiltration in ovarian cancer and synergizes with PD-1 blockade in a B cell-dependent manner
Source: PubMed Central journal article supplement (PMC7482823; doi:10.7150/thno.44871), 2020-08-25
Supplement: thnov10p10619s1.pdf [file thnov10p10619s1.pdf]

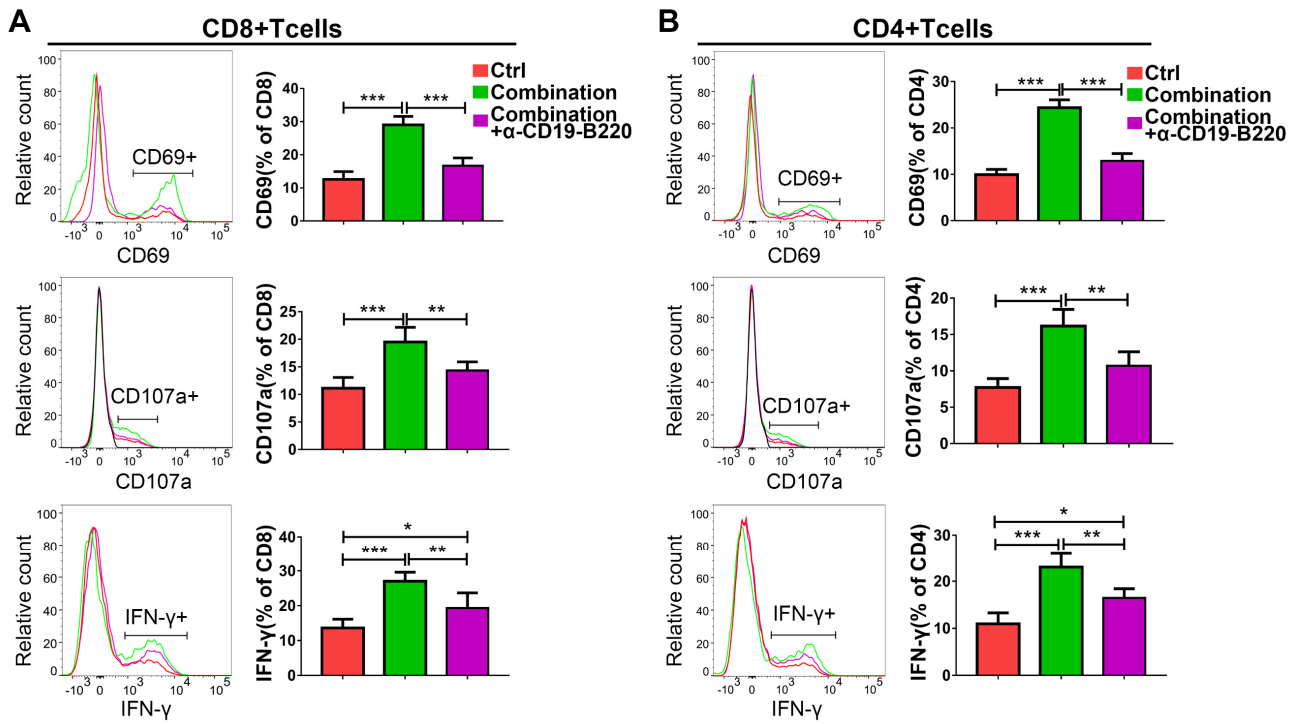

**Supplementary Figure 1. B cell depletion led to impaired activation and function of both CD8+T cells and CD4+T cells.** (A) The expression of CD69, IFN- $\gamma$  and CD107a in the CD8+ T cell population and (B) CD4+ T cell populations was analyzed by flow cytometry on day 15 after treatment initiation, n=6 mice.

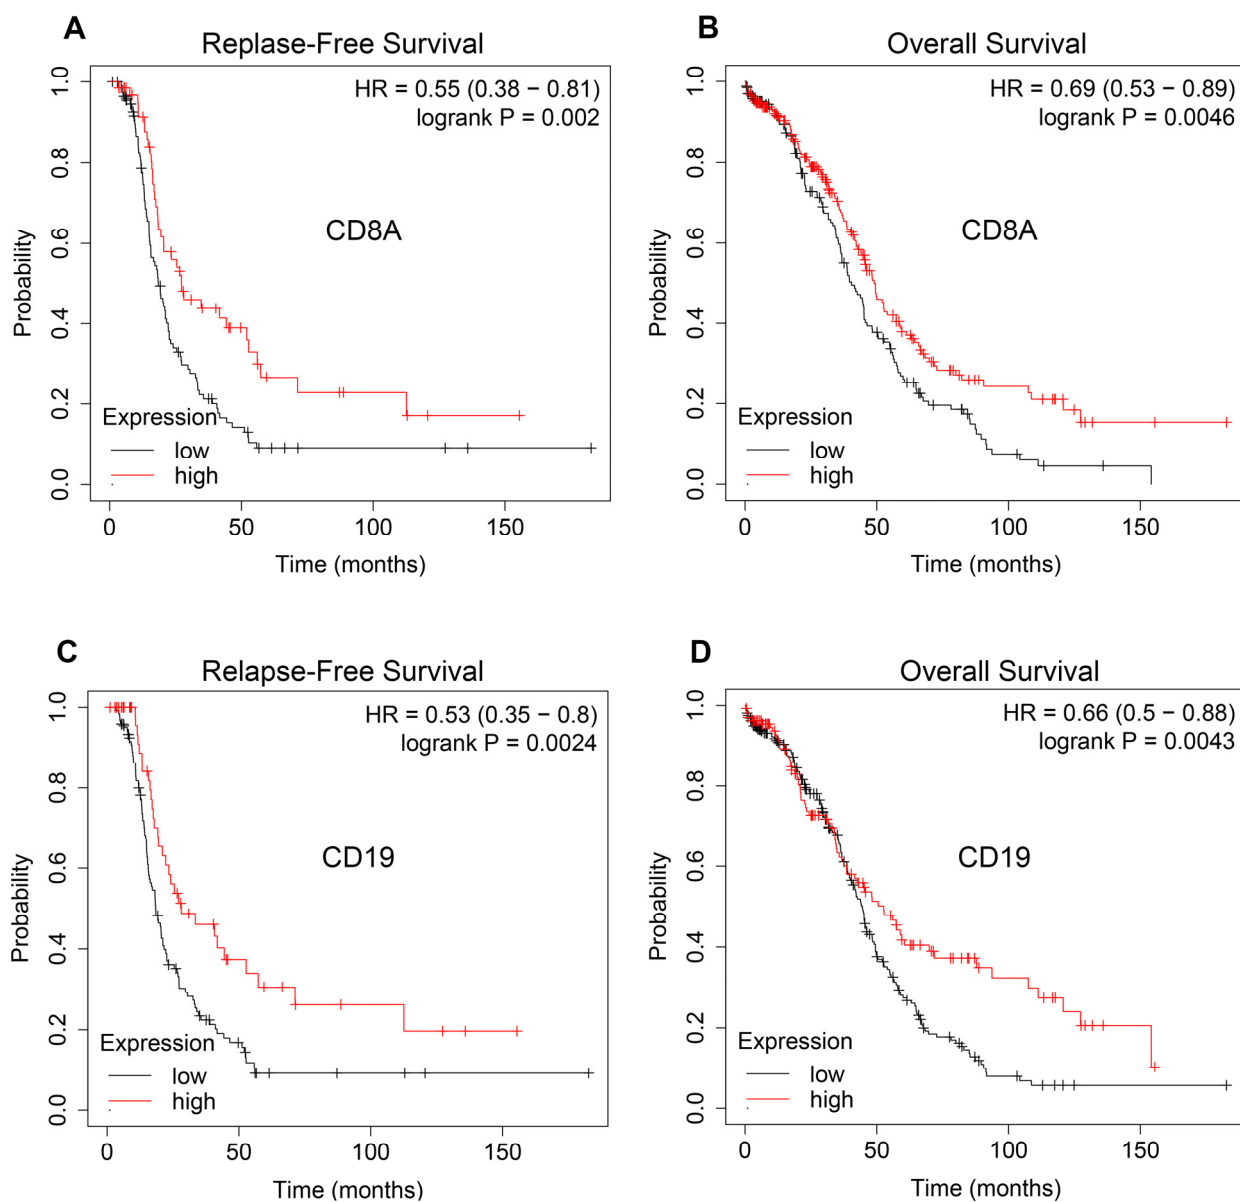

**Supplementary Figure 2. Prognostic value of CD8A and CD19 expression in human ovarian cancer.** Patient samples were classified as high expression (red) or low expression (black) to assess relapse-free survival (A&C) and overall survival (B&D). Data was analyzed using Kaplan Meier Plotter ([www.kmplot.com](http://www.kmplot.com)).

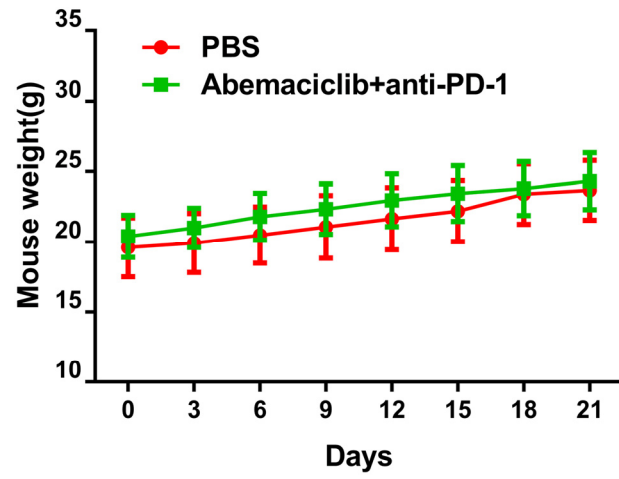

**Supplementary Figure 3. Measurements of mouse weight over time.** C57 mouse were administered with PBS or abemaciclib plus anti-PD-1 antibody for a totally period of 21 days, mouse weight were recorded every 3 days.

**Supplementary Table1. Analysis of variance for fixed effects**

|                            | <b>Df</b> | <b>Mean sq</b> | <b>F value</b> | <b>Pr &gt; F</b> |
|----------------------------|-----------|----------------|----------------|------------------|
| <b>Abma</b>                | 1         | 6180067        | 98.160         | 5.87e-15         |
| <b>α-PD-1</b>              | 1         | 30168          | 0.479          | 0.49109          |
| <b>Time</b>                | 1         | 17811251       | 282.901        | < 2e-16          |
| <b>Abema: α-PD-1</b>       | 1         | 1429253        | 22.701         | 9.93e-06         |
| <b>Abma: Time</b>          | 1         | 3292515        | 52.296         | 4.72e-10         |
| <b>α-PD-1: Time</b>        | 1         | 691313         | 10.980         | 0.00146          |
| <b>Abema: α-PD-1: Time</b> | 1         | 524828         | 8.336          | 0.00517          |

Bioluminescence quantification data were analyzed in a 2×2 arrangement for factorial analysis.

**Supplementary Table 2. Measurement of serological parameters after treatment**

| <b>Treatment</b>                  | <b>RBC<br/>(<math>\times 10^6/\mu\text{L}</math>)</b> | <b>WBC<br/>(<math>\times 10^3/\mu\text{L}</math>)</b> | <b>ALT<br/>(u/L)</b> | <b>AST<br/>(u/L)</b> | <b>LDH<br/>(u/L)</b> | <b>BUN<br/>(mg/L)</b> | <b>Cr<br/>(mg/L)</b> |
|-----------------------------------|-------------------------------------------------------|-------------------------------------------------------|----------------------|----------------------|----------------------|-----------------------|----------------------|
| <b>PBS</b>                        | 5.9 $\pm$ 0.2                                         | 11 $\pm$ 1.8                                          | 24 $\pm$ 6.7         | 91 $\pm$ 13.5        | 683 $\pm$ 187.2      | 8.1 $\pm$ 2.6         | 42 $\pm$ 0.6         |
| <b>Abemaciclib<br/>+anti-PD-1</b> | 5.4 $\pm$ 0.3                                         | 13 $\pm$ 3.2                                          | 25 $\pm$ 11.2        | 86 $\pm$ 16.4        | 659 $\pm$ 154.1      | 8.7 $\pm$ 3.2         | 43 $\pm$ 0.9         |

Serological parameters of C57 mice were analyzed 21 days after PBS or abemaciclib +anti-PD-1 treatment. RBC: red blood cell; WBC: white blood cell; ALT: alanine aminotransferase; AST: aspartate aminotransferase; LDH: lactate dehydrogenase; BUN: blood urea nitrogen; CR: creatinine.
